# Supplementary material
Source: HighWire-hosted journal article supplement (http://www.qdcxjkg.com/highwire/filestream/113883/field_highwire_adjunct_files/0/ERJ-01331-2012_Disclosures.pdf)
Supplement: ERJ-01331-2012_Disclosures.pdf [file ERJ-01331-2012_Disclosures.pdf]

**G. Camiciottoli:** has received fees for speaking from Novartis, Boehringer Ingelheim, Astra Zeneca, Chiesi. Travel to and participation at ERS congresses were funded by Astra Zeneca and Boehringer Ingelheim.

**F. Lavorini:** has received reimbursements for attending meetings and fees for speaking from Menarini Industrie Farmaceutiche, MEDA pharma, Mundipharma, AstraZeneca

**M. Pistolesi:** has received reimbursements and travel to medical meetings from Boehringer Ingelheim, GSK, Pfizer, Menarini, Novartis. M.P has received fees for speaking from Boehringer Ingelheim, GSK, Pfizer, Menarini, Novartis, Chiesi, Nycomed. M.P has received fees for consulting from Nycomed and GSK.
